# Supplementary material for: Tim/Timeless, a member of the replication fork protection complex, operates with the Warsaw breakage syndrome DNA helicase DDX11 in the same fork recovery pathway
Source: PubMed Central journal article supplement — Nucleic Acids Res. 2015 Oct 25;44(2):705–17. doi: 10.1093/nar/gkv1112 (PMC4737141; doi:10.1093/nar/gkv1112), 2015-10-25
Supplement: supp_gkv1112_nar-02619-d-2015-File009.pdf [file supp_gkv1112_nar-02619-d-2015-File009.pdf]

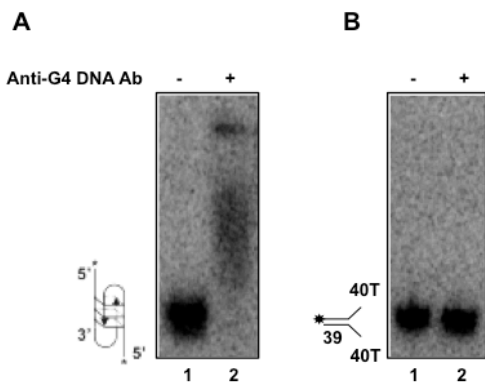

Supplementary Figure 1

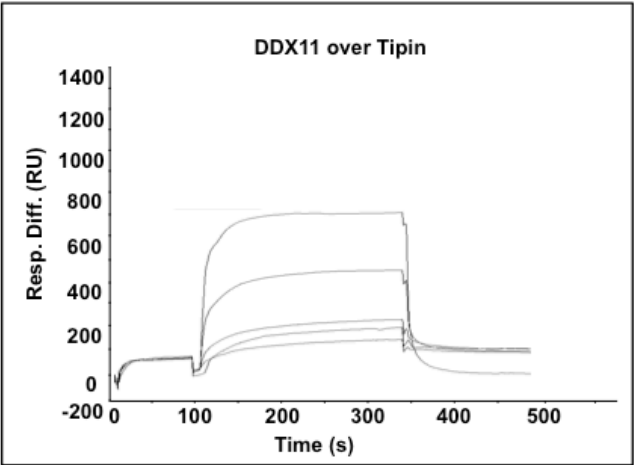

Supplementary Figure 2

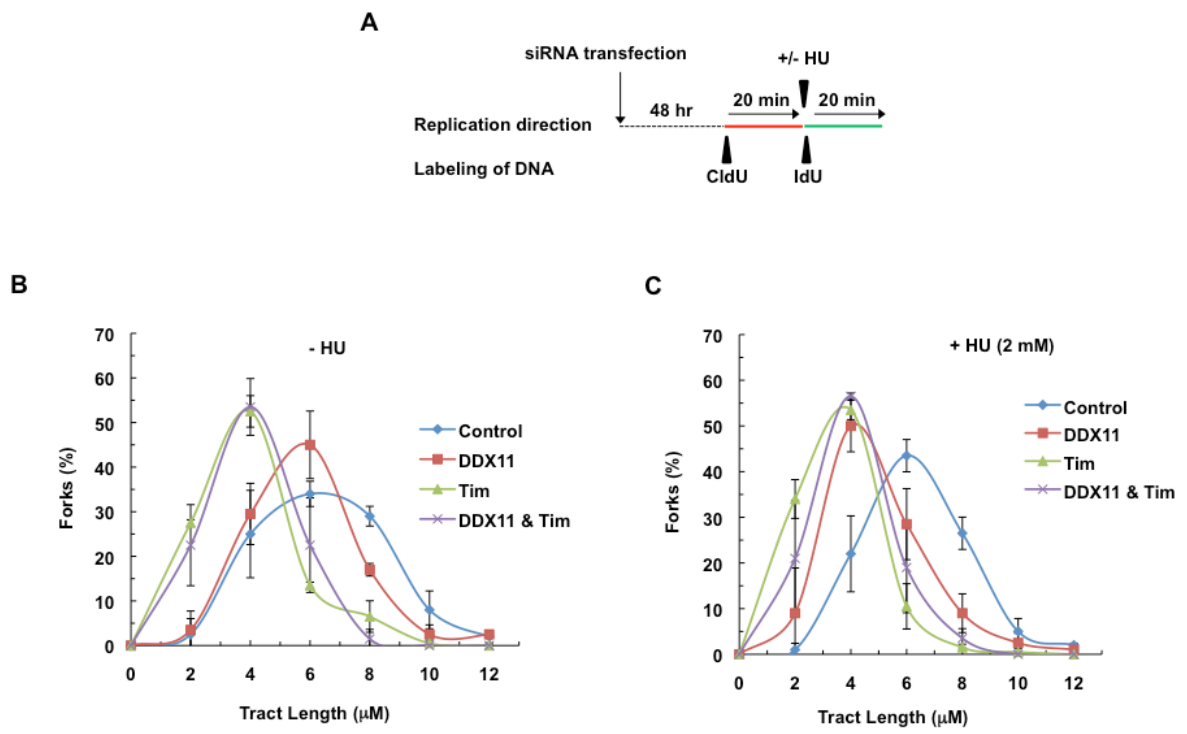

Supplementary Figure 3

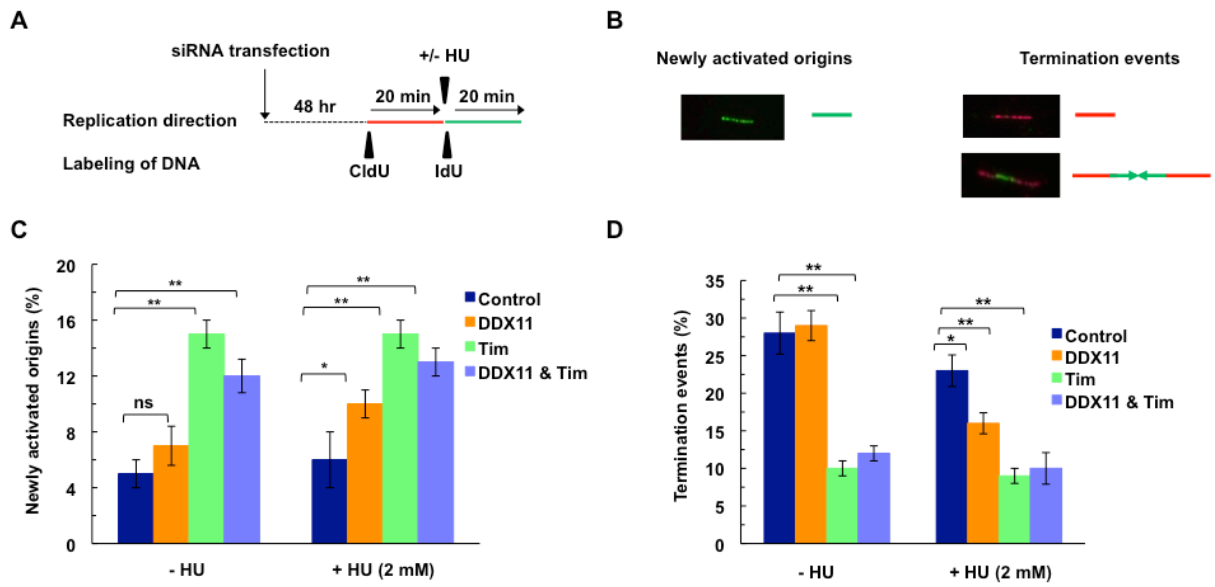

Supplementary Figure 4

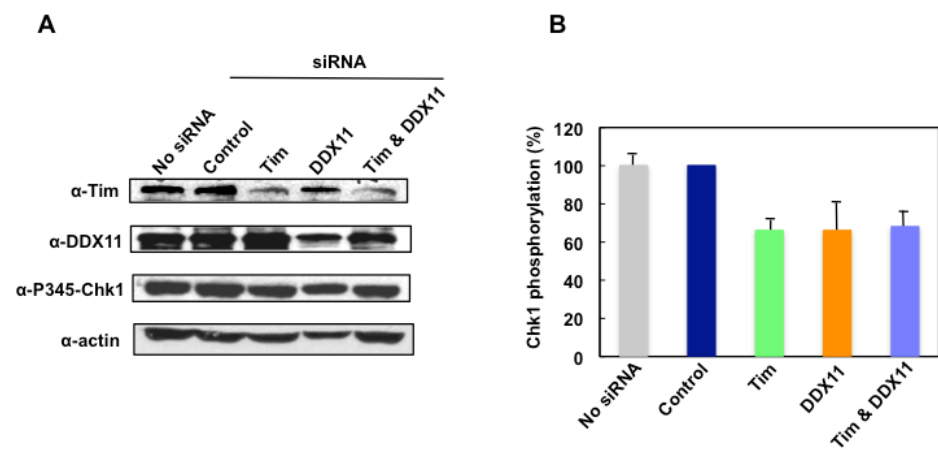

Supplementary Figure 5

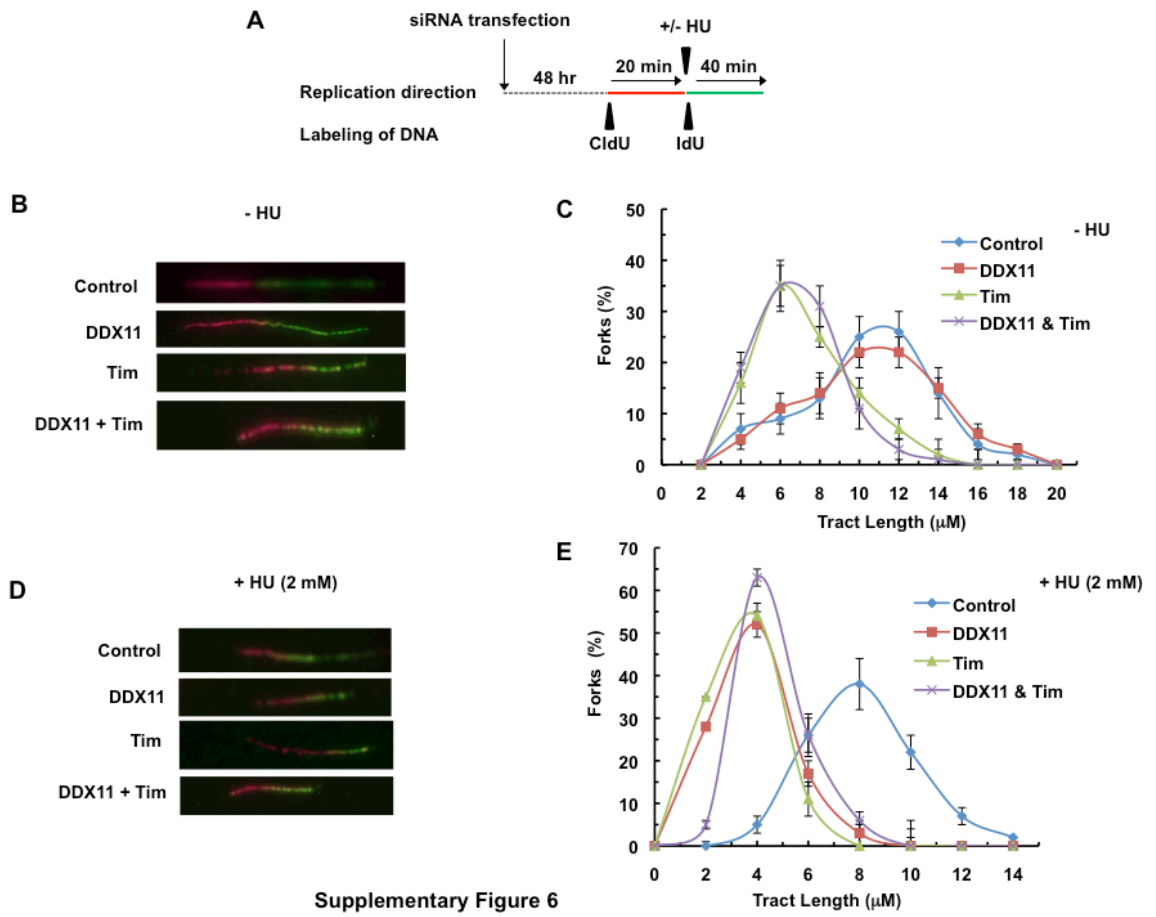

Supplementary Figure 6

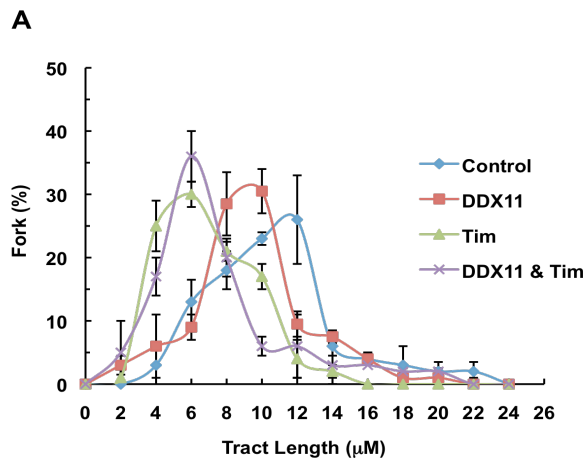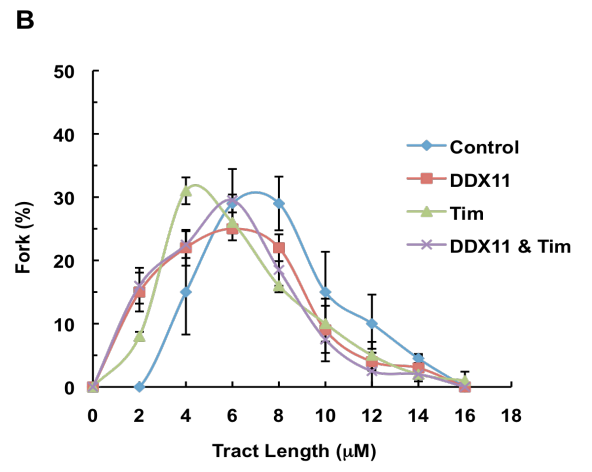

Supplementary Figure 7

## Supplementary Figure legends

Supplementary Figure 1. OX-1-G2' DNA substrate contains a G-quadruplex DNA structure. Mixtures (volume: 10  $\mu$ l) were prepared that contained anti-parallel bimolecular G-quadruplex DNA (OX-1-G2'; 87.5 ng, in *Panel A*) or forked DNA substrate (20 fmol, in *Panel B*) and no protein (*lane 1*) or anti-G4 DNA single chain BG4 antibody (20 fmol, *lane 2*), described by Biffi *et al.* (54). Following incubation for 15 min at 25 °C, complexes were separated by electrophoresis through 5% polyacrylamide/bis gels (37.5:1) in 0.5 X TBE containing 10 mM KCl.

Supplementary Figure 2. Dynamic interaction of DDX11 with Tipin. Surface plasmon resonance measurements were carried out to analyze the interaction of DDX11 with Tipin using a Biacore2000 instrument. Tipin (6000 RU) was immobilized on a CM5 sensor chip in 10 mM sodium acetate buffer pH 3.5, according to the manufacturer's instructions. To collect sensorgrams five increasing concentration values of human purified recombinant DDX11 (from 0 to 80 nM) in PBS buffer (50 mM sodium phosphate pH 7.5, 150 mM NaCl) were fluxed over the sensor chip surface at a flow rate of 20  $\mu$ l/min. Recorded sensorgrams were normalized to a baseline of 0 RU and a dissociation constant ( $K_D = 6.55 \times 10^{-7}$  M) value was calculated using the BIA Evaluation software.

Supplementary Figure 3. DNA fiber track assays on Tim- and/or DDX11-depleted HeLa cells. A) Schematic representation of the protocol used to track DNA fiber replication. Labeling of cells were done 48 hours after transfection of siRNAs (Tim #1 and/or DDX11 #2). First, cells were pulse-chased with CldU (*red label*); then, they were labeled with IdU (*green label*) for the indicated times. B) and C) Distribution of replication fork tract measured by CldU tract length in a DNA fiber labeled with CldU and IdU in cells transfected with the indicated siRNAs without and with HU treatment, respectively. CldU tract length represents mean of at least three experiments with SD and analysis is based on 150-250 DNA fibers from each experiment. CldU mean track length for the cells treated with indicated siRNA in the absence of HU are  $6.4 \pm 0.15$   $\mu$ M (control),  $5.0 \pm 0.29$   $\mu$ M (DDX11),  $3.0 \pm 0.11$   $\mu$ M (Tim),  $3.1 \pm 0.57$   $\mu$ M (Tim + DDX11); whereas, in the presence of HU, the mean track length are  $5.0 \pm 0.41$   $\mu$ M (control),  $4.2 \pm 0.81$   $\mu$ M (DDX11),  $2.7 \pm 0.22$   $\mu$ M (Tim),  $3.1 \pm 0.49$   $\mu$ M (Tim + DDX11).

Supplementary Figure 4. Frequency of newly fired origins and termination events in Tim- and/or DDX11-depleted HeLa cells. A) Schematic representation of the protocol used to track DNA fiber replication. B) Representatives of fluorescently-labeled DNA fibers from HeLa cells accompanied with a schematic of the corresponding replication events. Since no fork pausing is evident under the indicated treatment, fibers showing CldU-only labeling represent termination and not fork stalling events. C) Frequency of newly activated replication origins calculated from number of IdU tract (*green label*) only and D) frequency of termination events based on the CldU (*red*) and CldU-IdU-CldU (*red-green-red*) tract in HeLa cells transfected with siRNAs (Tim #1 and/or DDX11 #2), as described in *Material and Methods* in the main text. Data represent mean of at least three experiments with SD and analysis is based on 150-250 DNA fibers from each experiment. \* =  $P < 0.05$ , \*\* =  $P < 0.001$  (Student's *t*-test), *ns* = not significant.



Supplementary Figure 5. A) Western blot analysis of Chk1 phosphorylation at Serine 345 in Tim- and/or DDX11-depleted HeLa cells. HeLa cells were transfected with the indicated siRNAs (Tim #2 and/or DDX11 #5), as described in the main text. After 48 hours, cells were treated with HU at 2 mM for 20 min. Whole cell extract was prepared using lysis buffer (10 mM Hepes-NaOH, pH 7.5, 150 mM NaCl, 1 mM dithiothreitol, 0.1% Triton X-100, 0.5 mM phenylmethylsulfonyl fluoride, protease and phosphatase inhibitors cocktails from Roche). Aliquots (10  $\mu$ g of total protein/lane) were subjected to electrophoresis on a 10% polyacrylamide/bis gel (19:1) containing SDS. The gel was electro-transferred onto a membrane and analyzed by immuno-blot using the indicated antibodies. B) Densities of phosphorylated Chk1 band were quantified using the computer software Image J and data are expressed as percentages of the sample treated with scrambled siRNA (named *Control*). Mean values and standard deviations are calculated from three independent experiments.

Supplementary Figure 6. DNA fiber track assays on Tim- and/or DDX11-depleted HeLa cell after 40 min incubation with IdU. A) Schematic representation of the protocol used to track DNA fiber replication. Labeling of cells were done 48 hours after transfection of siRNAs (Tim #2 and/or DDX11 #5). First, cells were pulse-chased with CldU (*red label*); then, they were labeled with IdU (*green label*) for the indicated times. B) and D) Representatives of fluorescently-labeled DNA fibers from cells treated with the indicated siRNAs, as described in the main text, without and with HU treatment, respectively. C) and E) Distribution of replication fork tract measured by IdU tract length of cells transfected the indicated siRNAs, as described in the main text, in a DNA fiber labeled with CldU and IdU, without and with HU treatment, respectively. IdU tract length represents mean of at least three experiments with SD and analysis is based on 150-250 DNA fibers from each experiment. IdU mean track length for the cells treated with indicated siRNA in the absence of HU are  $11.6 \pm 0.4 \mu\text{M}$  (control),  $10.6 \pm 0.85 \mu\text{M}$  (DDX11),  $6.3 \pm 0.28 \mu\text{M}$  (Tim),  $6.1 \pm 0.35 \mu\text{M}$  (Tim + DDX11); whereas, in the presence of HU, the mean track length are  $7.9 \pm 0.11 \mu\text{M}$  (control),  $4.9 \pm 0.97 \mu\text{M}$  (DDX11),  $4.7 \pm 0.28 \mu\text{M}$  (Tim),  $3.8 \pm 0.36 \mu\text{M}$  (Tim + DDX11).

Supplementary Figure 7. IdU track length during replication fork recovery after HU treatment. 48 hours after transfection of siRNAs (Tim #2 and/or DDX11 #5), HeLa cells were labeled for 30 min with CldU (*red label*); then they were treated with (or without) HU at 2 mM for 14 hours and then labeled for 60 min with IdU (*green label*). Distribution of replication fork tract measured by IdU tract length in cells transfected with the indicated siRNAs, as described in the main text, in a DNA fiber labeled with CldU and IdU, without (A) and with (B) HU treatment, respectively. IdU tract length represents mean of at least three experiments with SD and analysis is based on 50-100 DNA fibers from each experiment. IdU mean track length for the cells treated with indicated siRNA in the absence of HU treatment are  $11.2 \pm 2 \mu\text{M}$  (control),  $8.7 \pm 1.2 \mu\text{M}$  (DDX11),  $5.7 \pm 0.5 \mu\text{M}$  (Tim),  $5.7 \pm 1 \mu\text{M}$  (Tim + DDX11); whereas, in the presence of HU treatment, the mean track length are  $7.6 \pm 0.5 \mu\text{M}$  (control),  $5.6 \pm 0.4 \mu\text{M}$  (DDX11),  $5.1 \pm 0.8 \mu\text{M}$  (Tim),  $5.6 \pm 0.2 \mu\text{M}$  (Tim + DDX11).

## **SUPPLEMENTARY REFERENCES**

54. Biffi, G., Tannahill, D., McCafferty, J. and Balasubramanian, S. (2013) Quantitative visualization of DNA G-quadruplex structures in human cells. *Nat. Chem.*, 5,182-186.
